# Supplementary material for: Novel bimetallic lanthanide metal–organic frameworks (Ln-MOFs) for colour-tuning through energy-transfer between visible and near-infrared emitting Ln3+ ions
Source: Royal Society of Chemistry journal article supplement (doi:10.1039/c8tc06445h), 2019-01-01
Supplement: c8tc06445h1.pdf [file c8tc06445h1.pdf]

## Electronic Supplementary Information (ESI)

### **Novel bimetallic Lanthanide metal-organic frameworks (Ln-MOFs) for color-tuning through energy-transfer between visible-emitting and near-infrared-emitting Ln<sup>3+</sup> ions**

Min Zeng<sup>ab</sup>, Chuanlang Zhan<sup>ab\*</sup> and Jiannian Yao<sup>ab</sup>

(a) Beijing National Laboratory for Molecular Sciences, CAS Key Laboratory of Photochemistry, Institute of Chemistry, Chinese Academy of Sciences, Beijing 100080, P. R. China.

(b) University of Chinese Academy of Sciences, Beijing, 100049, P. R. China.

\*E-mail: [clzhan@iccas.ac.cn](mailto:clzhan@iccas.ac.cn).

Table S1 Crystallographic Data for NdL<sub>2</sub>

|                                         | NdL <sub>2</sub>                                                |
|-----------------------------------------|-----------------------------------------------------------------|
| Empirical formula                       | C <sub>14</sub> H <sub>7</sub> N <sub>2</sub> Nd O <sub>8</sub> |
| Formula weight                          | 475.46                                                          |
| Temperature (K)                         | 173.15                                                          |
| Wavelength (Å)                          | 0.71073                                                         |
| Crystal system                          | Orthorhombic                                                    |
| Space group                             | Pbcn                                                            |
| a (Å)                                   | a = 9.973(4)                                                    |
| b (Å)                                   | b = 8.757(4)                                                    |
| c (Å)                                   | c = 15.809(6)                                                   |
| α (°)                                   | 90                                                              |
| β (°)                                   | 90                                                              |
| γ (°)                                   | 90                                                              |
| Volume (Å <sup>3</sup> )                | 1380.6(10)                                                      |
| Z                                       | 4                                                               |
| Density (calculated)                    | 2.287 mg/m <sup>3</sup>                                         |
| Absorption coefficient                  | 3.814 mm <sup>-1</sup>                                          |
| F(000)                                  | 916                                                             |
| Crystal size                            | 0.386 x 0.183 x 0.136 mm <sup>3</sup>                           |
| θ <sub>min</sub> , θ <sub>max</sub> (°) | 3.289 to 27.497°                                                |
| Index ranges                            | -12 ≤ h ≤ 12, -11 ≤ k ≤ 11,<br>-20 ≤ l ≤ 20                     |
| Reflections collected                   | 5346                                                            |
| Independent reflections                 | 1549 [R(int) = 0.0486]                                          |
| Completeness to theta = 25.242°         | 97.6 %                                                          |
| Max. and min. transmission              | 1.00000 and 0.56743                                             |
| Refinement method                       | Full-matrix least-squares on F <sup>2</sup>                     |
| Data / restraints / parameters          | 1549 / 0 / 114                                                  |
| Goodness-of-fit on F <sup>2</sup>       | 1.156                                                           |
| R1, wR2 [I > 2σ (I)]                    | 0.0314, 0.0916                                                  |
| R1, wR2 [all data]                      | 0.0321, 0.0925                                                  |
| Largest diff. peak and hole             | 0.803 and -0.948 e.Å <sup>-3</sup>                              |

Table S2 Selected bond lengths (Å) and angles (°) for NdL<sub>2</sub>

|               |            |               |           |
|---------------|------------|---------------|-----------|
| Nd1-N1#1      | 2.622(2)   | O1-Nd1-O4#5   | 74.87(9)  |
| Nd1-N1#2      | 2.622(2)   | O1#3-Nd1-O4#4 | 74.87(9)  |
| Nd1-O1#3      | 2.382(2)   | O1-Nd1-O4#4   | 77.14(9)  |
| Nd1-O1        | 2.382(2)   | O1#3-Nd1-O4#5 | 77.14(9)  |
| Nd1-O2#2      | 2.411(2)   | O2#1-Nd1-N1#2 | 70.37(7)  |
| Nd1-O2#1      | 2.411(2)   | O2#2-Nd1-N1#2 | 64.53(7)  |
| Nd1-O4#4      | 2.442(3)   | O2#2-Nd1-N1#1 | 70.37(7)  |
| Nd1-O4#5      | 2.442(3)   | O2#1-Nd1-N1#1 | 64.53(7)  |
| N1#1-Nd1-N1#2 | 120.50(9)  | O2#2-Nd1-O2#1 | 78.97(10) |
| O1-Nd1-N1#2   | 123.50(7)  | O2#1-Nd1-O4#4 | 110.61(9) |
| O1-Nd1-N1#1   | 78.70(7)   | O2#1-Nd1-O4#5 | 133.52(9) |
| O1#3-Nd1-N1#2 | 78.70(7)   | O2#2-Nd1-O4#4 | 133.52(9) |
| O1#3-Nd1-N1#1 | 123.50(7)  | O2#2-Nd1-O4#5 | 110.61(9) |
| O1#3-Nd1-O1   | 137.96(11) | O4#4-Nd1-N1#2 | 75.97(9)  |
| O1#3-Nd1-O2#1 | 145.57(7)  | O4#4-Nd1-N1#1 | 155.71(9) |
| O1#3-Nd1-O2#2 | 74.27(8)   | O4#5-Nd1-N1#2 | 155.71(9) |
| O1-Nd1-O2#2   | 145.57(7)  | O4#5-Nd1-N1#1 | 75.97(9)  |
| O1-Nd1-O2#1   | 74.27(8)   | O4#4-Nd1-O4#5 | 95.22(15) |

Symmetry codes: #1  $-x+1/2, y+1/2, z$ , #2  $x+1/2, y+1/2, -z+1/2$ , #3  $-x+1, y, -z+1/2$ , #4  $-x+1/2, -y+1/2, z-1/2$ , #5  $x+1/2, -y+1/2, -z+1$

Table S3 Crystallographic Data for Nd<sub>2</sub>L<sub>3</sub>

|                                         | Nd <sub>2</sub> L <sub>3</sub>              |
|-----------------------------------------|---------------------------------------------|
| Empirical formula                       | C21 H13 N3 Nd2 O14                          |
| Formula weight                          | 819.82                                      |
| Temperature (K)                         | 173.15                                      |
| Wavelength (Å)                          | 0.71073                                     |
| Crystal system                          | Monoclinic                                  |
| Space group                             | P 1 21/c 1                                  |
| a (Å)                                   | a = 6.4925(13)                              |
| b (Å)                                   | b = 17.852(4)                               |
| c (Å)                                   | c = 9.350(2)                                |
| α (°)                                   | 90                                          |
| β (°)                                   | 94.942(3)                                   |
| γ (°)                                   | 90                                          |
| Volume (Å <sup>3</sup> )                | 1079.7(4)                                   |
| Z                                       | 2                                           |
| Density (calculated)                    | 2.522 mg/m <sup>3</sup>                     |
| Absorption coefficient                  | 4.846 mm <sup>-1</sup>                      |
| F(000)                                  | 784                                         |
| Crystal size                            | 0.291 x 0.212 x 0.109 mm <sup>3</sup>       |
| θ <sub>min</sub> , θ <sub>max</sub> (°) | 3.149 to 27.483°                            |
| Index ranges                            | -8<=h<=8, -23<=k<=22,<br>-12<=l<=11         |
| Reflections collected                   | 8672                                        |
| Independent reflections                 | 2474 [R(int) = 0.0490]                      |
| Completeness to theta = 25.242°         | 99.8 %                                      |
| Max. and min. transmission              | 1.00000 and 0.46277                         |
| Refinement method                       | Full-matrix least-squares on F <sup>2</sup> |
| Data / restraints / parameters          | 2474 / 0 / 176                              |
| Goodness-of-fit on F <sup>2</sup>       | 1.167                                       |
| R1, wR2 [I>2σ (I)]                      | 0.0322, 0.0751                              |
| R1, wR2 [all data]                      | 0.0330, 0.0757                              |
| Largest diff. peak and hole             | 1.368 and -1.491 e.Å <sup>-3</sup>          |

Table S4 Selected bond lengths (Å) and angles (°) for Nd<sub>2</sub>L<sub>3</sub>

|               |            |               |            |
|---------------|------------|---------------|------------|
| C7-Nd1#1      | 2.955(4)   | O2#4-Nd1-O7   | 66.63(11)  |
| N2-Nd1#3      | 2.691(4)   | O3#5-Nd1-C7#5 | 24.66(11)  |
| Nd1-O1        | 2.417(3)   | O3#5-Nd1-N2#3 | 133.83(10) |
| Nd1-O2#4      | 2.424(3)   | O3#5-Nd1-O4#5 | 49.78(9)   |
| Nd1-O3#5      | 2.577(3)   | O4#5-Nd1-C7#5 | 25.75(10)  |
| Nd1-O4#5      | 2.679(3)   | O4#3-Nd1-C7#5 | 114.78(11) |
| Nd1-O4#3      | 2.496(3)   | O4#5-Nd1-N2#3 | 135.24(10) |
| Nd1-O5        | 2.426(3)   | O4#3-Nd1-N2#3 | 62.02(10)  |
| Nd1-O6#6      | 2.460(3)   | O4#3-Nd1-O3#5 | 90.14(10)  |
| Nd1-O7        | 2.556(3)   | O4#3-Nd1-O4#5 | 138.48(10) |
|               |            | O4#3-Nd1-O7   | 133.16(10) |
| N2#3-Nd1-C7#5 | 144.71(11) | O5-Nd1-C7#5   | 75.34(11)  |
| O1-Nd1-C7#5   | 102.43(11) | O5-Nd1-N2#3   | 69.39(11)  |
| O1-Nd1-N2#3   | 74.69(10)  | O5-Nd1-O3#5   | 71.09(11)  |
| O1-Nd1-O2#4   | 140.59(11) | O5-Nd1-O4#5   | 75.06(11)  |
| O1-Nd1-O3#5   | 125.20(10) | O5-Nd1-O4#3   | 82.45(12)  |
| O1-Nd1-O4#3   | 136.53(10) | O5-Nd1-O6#6   | 140.77(11) |
| O1-Nd1-O4#5   | 76.72(10)  | O5-Nd1-O7     | 141.43(11) |
| O1-Nd1-O5     | 86.20(11)  | O6#6-Nd1-C7#5 | 143.53(11) |
| O1-Nd1-O6#6   | 80.38(11)  | O6#6-Nd1-N2#3 | 71.53(11)  |
| O1-Nd1-O7     | 76.06(10)  | O6#6-Nd1-O3#5 | 144.74(11) |
| O2#4-Nd1-C7#5 | 80.62(12)  | O6#6-Nd1-O4#5 | 135.42(10) |
| O2#4-Nd1-N2#3 | 124.30(11) | O6#6-Nd1-O4#3 | 82.47(11)  |
| O2#4-Nd1-O3#5 | 69.60(11)  | O6#6-Nd1-O7   | 69.91(11)  |
| O2#4-Nd1-O4#3 | 70.29(10)  | O7-Nd1-C7#5   | 75.50(11)  |
| O2#4-Nd1-O4#5 | 99.50(10)  | O7-Nd1-N2#3   | 134.58(11) |
| O2#4-Nd1-O5   | 131.40(11) | O7-Nd1-O3#5   | 91.52(11)  |
| O2#4-Nd1-O6#6 | 75.47(11)  | O7-Nd1-O4#5   | 67.71(10)  |

Symmetry codes: #1 -x+1, y+1/2, -z+1/2, #3 -x+1, -y+1, -z+1, #4 x, -y+1/2, z+1/2, #5 -x+1, y-1/2, -z+1/2  
#6 x-1, y, z

Table S5. The x value in  $M_{1-x}Nd_xL_2$  during synthesis (theor) and as determined by ICP-MS analysis of the final product

| Theor |      | ICP-MS |      |
|-------|------|--------|------|
| M     | Eu   | Tb     | Dy   |
| 0.60  | 0.58 | 0.58   | 0.58 |
| 0.40  | 0.42 | 0.40   | 0.41 |
| 0.33  | 0.34 | 0.34   | 0.32 |
| 0.25  | 0.25 | 0.24   | 0.25 |
| 0.15  | 0.15 | 0.14   | 0.15 |

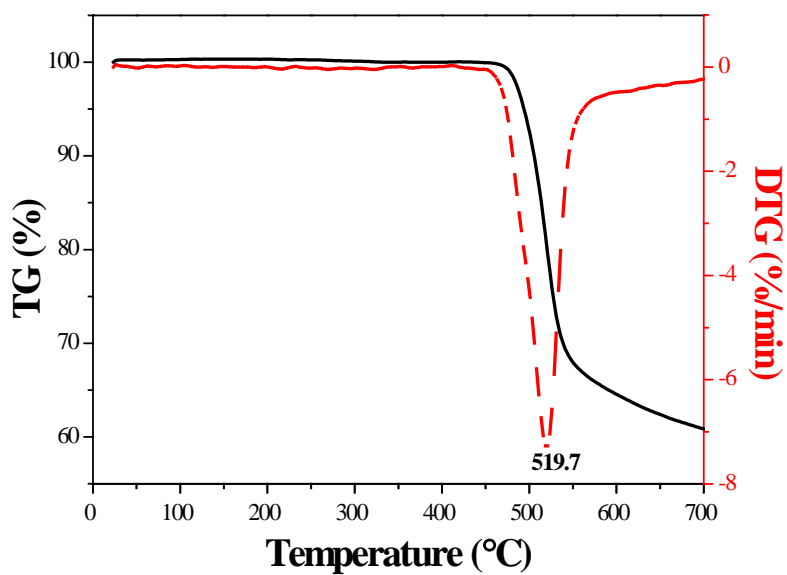

Fig. S1. TG/DTG curves for  $NdL_2$ .

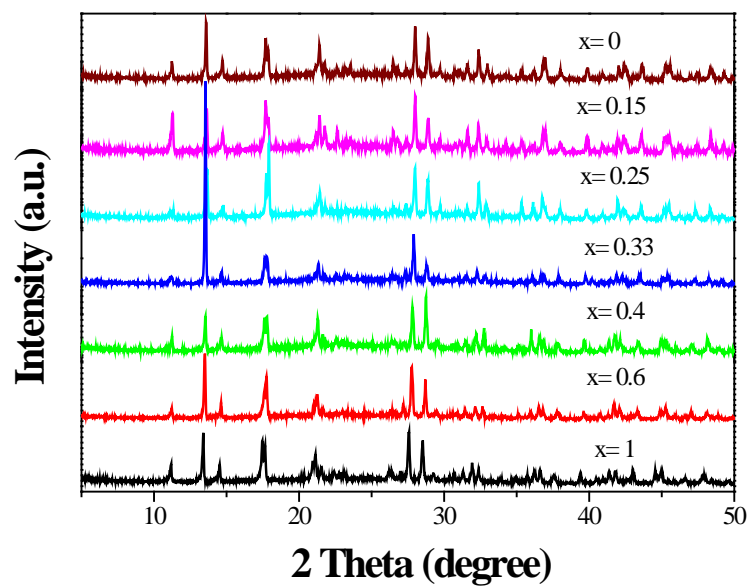

Fig. S2. Measured PXRD patterns of bimetallic Tb<sub>1-x</sub>Nd<sub>x</sub>L<sub>2</sub>.

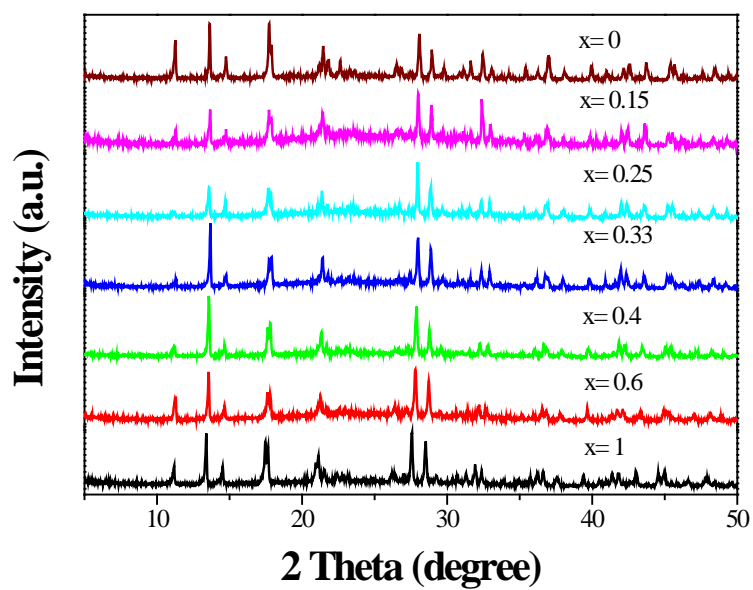

Fig. S3. Measured PXRD patterns of bimetallic Dy<sub>1-x</sub>Nd<sub>x</sub>L<sub>2</sub>.

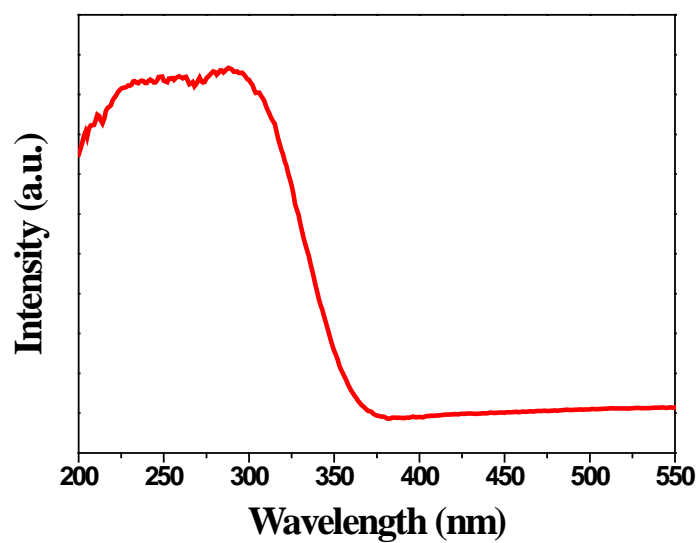

Fig. S4. Solid-state UV-vis absorption spectrum of L

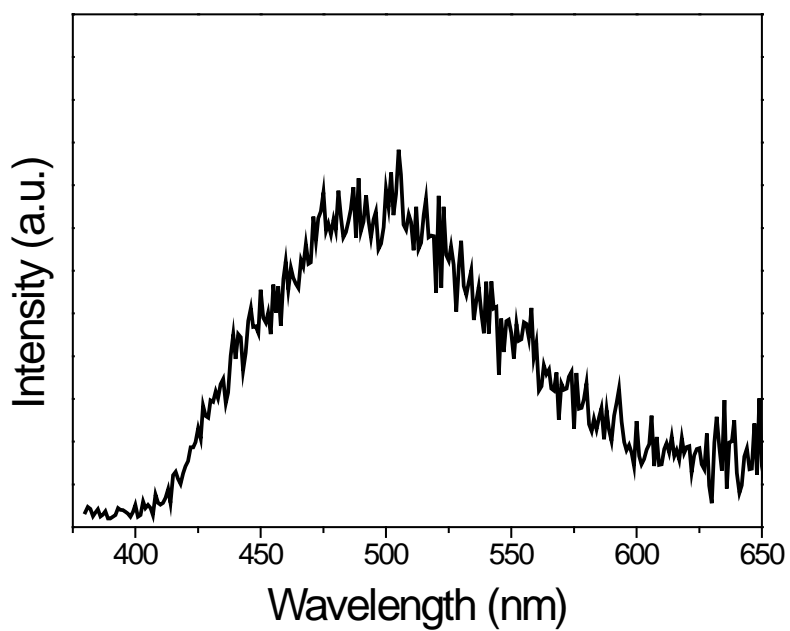

Fig. S5. Phosphorescence spectrum of  $GdL_2$  at 77 K.

(Note: The triplet state of L was determined from the phosphorescence spectrum of  $GdL_2$ . The phosphorescence from the Gd-MOF is justified by the absence of any ionic resonance levels below the triplet state of the chelate. The triplet state energy levels were determined from the shortest wavelength phosphorescence band of the  $GdL_2$ .<sup>1)</sup>)



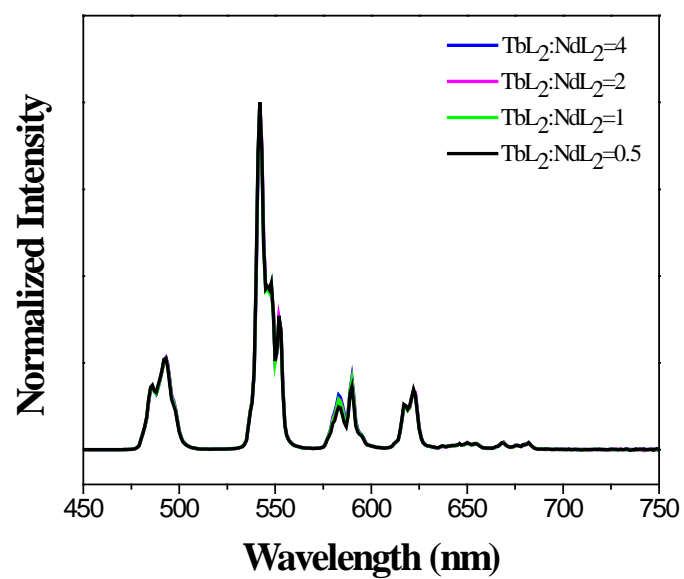

Fig. S6 Solid-state emission spectra of the physical mixture of TbL<sub>2</sub> and NdL<sub>2</sub> with different ratios

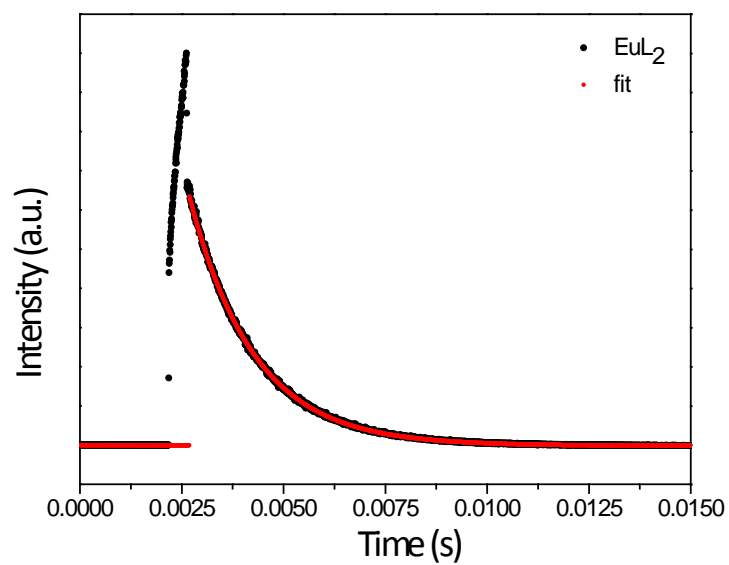

Fig. S7 Time-resolved emission decay curves of EuL<sub>2</sub> (612 nm)

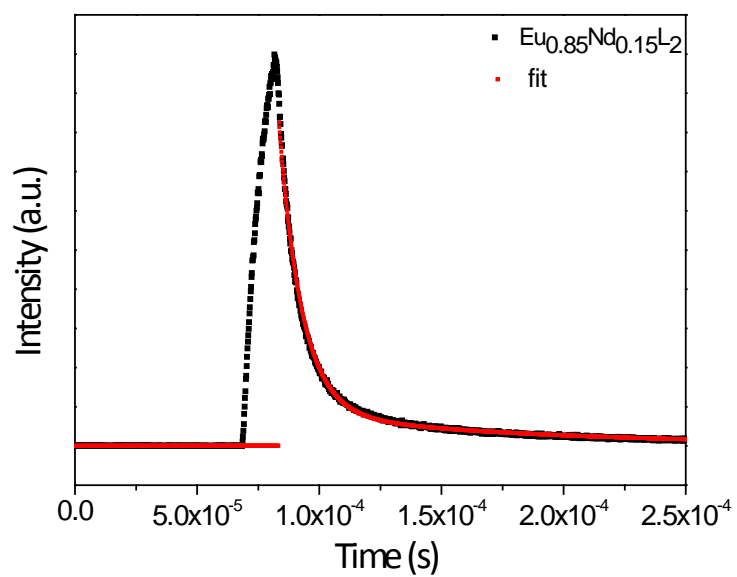

Fig. S8 Time-resolved emission decay curves of Eu<sub>0.85</sub>Nd<sub>0.15</sub>L<sub>2</sub> (612 nm)

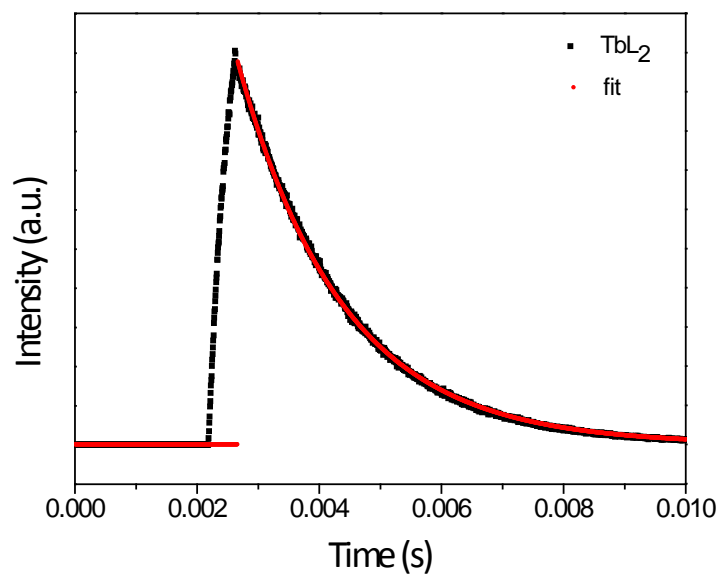

Fig. S9 Time-resolved emission decay curves of TbL<sub>2</sub> (542 nm)

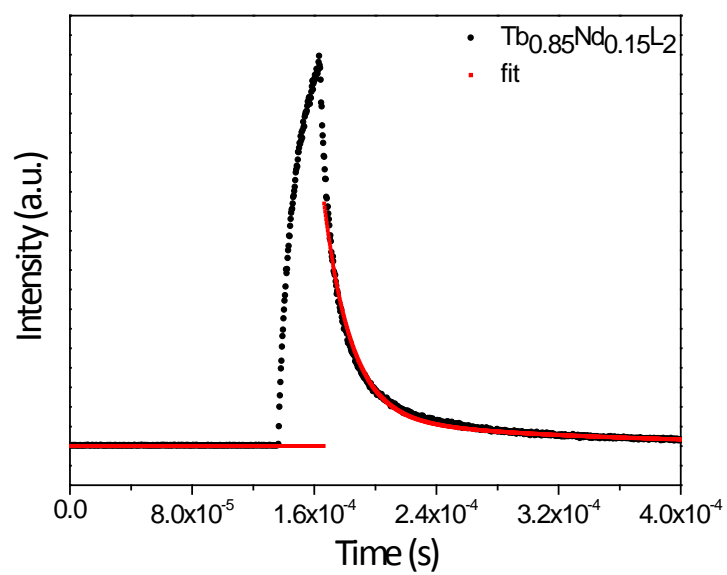

Fig. S10 Time-resolved emission decay curves of  $\text{Tb}_{0.85}\text{Nd}_{0.15}\text{L}_2$  (542 nm)

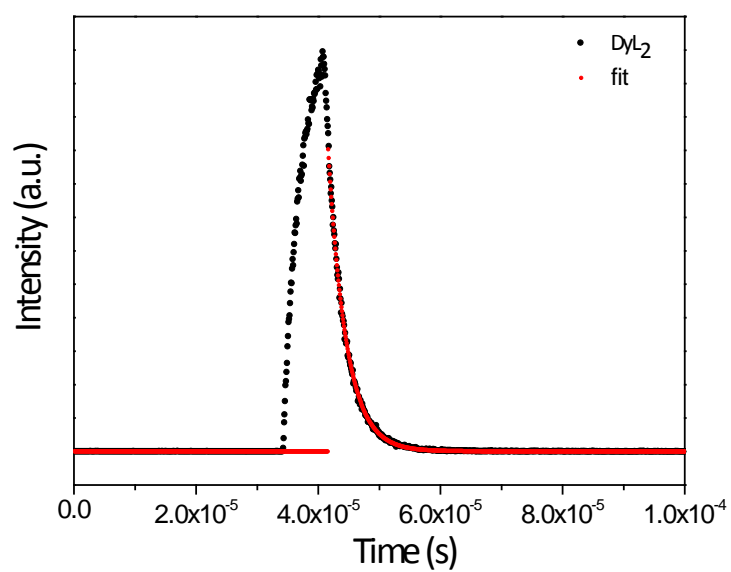

Fig. S11 Time-resolved emission decay curves of  $\text{DyL}_2$  (571 nm)

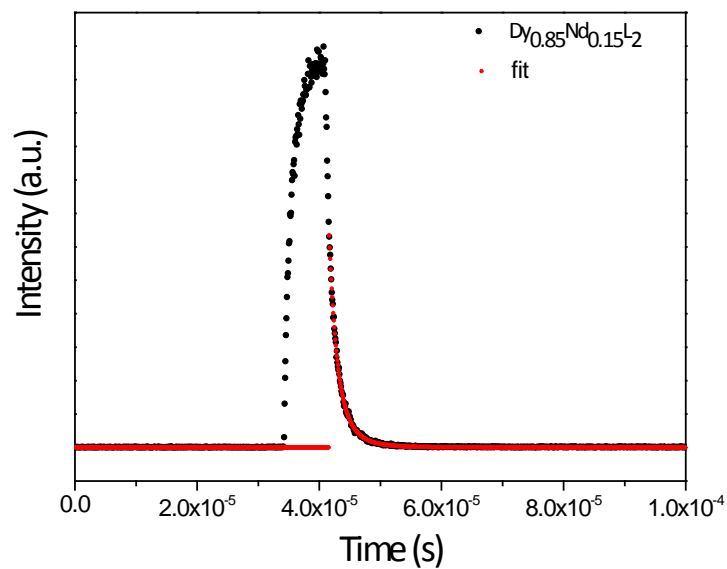

Fig. S12 Time-resolved emission decay curves of  $\text{Dy}_{0.85}\text{Nd}_{0.15}\text{L}_2$ (571 nm)

Table S6 Fluorescent lifetimes of  $\text{LnL}_2$  and  $\text{M}_{1-x}\text{Nd}_x\text{L}_2$  (M= Eu, Tb or Dy)

| Sample                                                 | $\tau_1$ (s) | $\tau_2$ (s) | Average Life Time(s) |
|--------------------------------------------------------|--------------|--------------|----------------------|
| <b>EuL<sub>2</sub></b>                                 | 1.58E-03     |              | 1.58E-03             |
| <b>Eu<sub>0.85</sub>Nd<sub>0.15</sub>L<sub>2</sub></b> | 9.57E-05     | 9.28E-06     | 1.83E-05             |
| <b>TbL<sub>2</sub></b>                                 | 1.71E-03     |              | 1.71E-03             |
| <b>Tb<sub>0.85</sub>Nd<sub>0.15</sub>L<sub>2</sub></b> | 1.49E-04     | 1.78E-05     | 3.36E-05             |
| <b>DyL<sub>2</sub></b>                                 | 2.93E-06     |              | 2.93E-06             |
| <b>Dy<sub>0.85</sub>Nd<sub>0.15</sub>L<sub>2</sub></b> | 1.22E-06     | 3.03E-06     | 1.66E-06             |

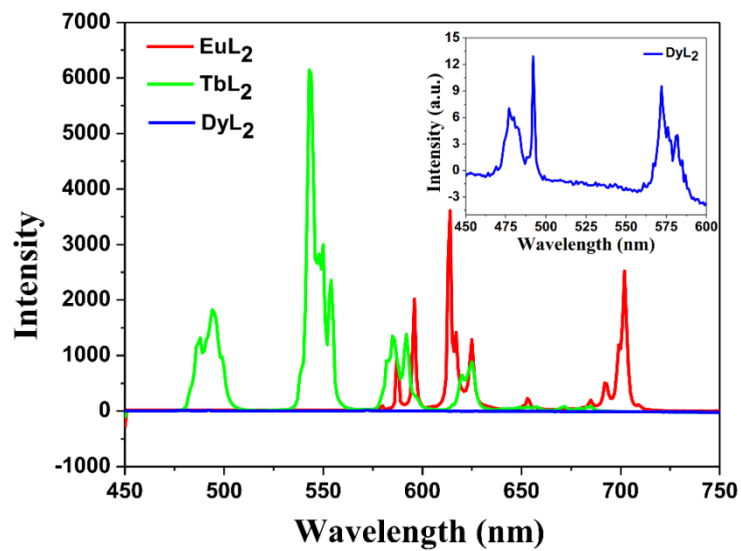

Fig. S13 Emission spectra of EuL<sub>2</sub> (red), TbL<sub>2</sub> (green) and DyL<sub>2</sub> (blue), respectively.

1. B. D. Chandler, D. T. Cramb and G. K. H. Shimizu, *Journal of the American Chemical Society*, 2006, **128**, 10403-10412.
